# Supplementary material for: Tag-free, specific conjugation of glycosylated IgG1 antibodies using microbial transglutaminase
Source: Royal Society of Chemistry journal article supplement (doi:10.1039/d2ra05630e), 2022-01-01
Supplement: d2ra05630e1.pdf [file d2ra05630e1.pdf]

Supporting information

Tag-Free, Specific Conjugation of Glycosylated IgG1 Antibodies Using Microbial Transglutaminase

Adem Hadjabdelhafid-Parisien, Sebastian Bitsch, Arturo Macarrón Palacios, Lukas Deweid, Harald Kolmar & Joelle N. Pelletier.

## Methods

### Materials

Unless otherwise stated, the materials were purchased from Carl Roth GmbH.

### Site-directed mutagenesis

Template DNA (pTT5 trastuzumab heavy chain and pTT5 trastuzumab light chain) was kindly provided by Merck KGaA (Darmstadt, Germany). Glutamine-coding sequences were introduced at specific positions in the pTT5 trastuzumab heavy chain plasmid by site-directed mutagenesis. The primers used are provided in **Supporting Table 1**. Template (98 ng), dNTPs (200  $\mu$ M each), primers (0.5  $\mu$ M each), HF green buffer and Phusion® polymerase (Thermo Fischer) and nuclease-free H<sub>2</sub>O were made up to a final volume of 50  $\mu$ L. PCR was initiated with denaturation at 98 °C for 30 s, followed by amplification with 30 cycles of denaturation at 98 °C for 30 s, annealing at 65 °C for 30 s, and polymerization at 72 °C for 3 min. PCR was terminated with extension at 72 °C for 5 min. The template was digested with 2 U of DpnI restriction enzyme (Thermo Fischer) at 37 °C for 16 hours, then deactivated at 80 °C for 20 minutes. PCR products were purified with PCR cleanup kits (Promega) according to the manufacturer's instructions. Purified PCR products were transformed into DH5 $\alpha$  electrocompetent cells and selected on double yeast-tryptone media (dYT)-agar + Amp (100  $\mu$ g/mL) and incubated for 16 h at 37 °C. Single colonies were used to inoculate 5 mL of dYT + Amp for 16 h at 37 °C with shaking and plasmids were isolated using a mini-prep kit (Promega) according to the manufacturer's instructions. Isolated plasmids were analyzed by DNA Sanger sequencing at Microsynth Seqlab GmbH (Germany) or at *plateforme de séquençage Génome Québec*. Sequence-confirmed colonies were propagated in 50 mL dYT + Amp medium. Plasmids were isolated using a midi-prep kit (Promega) according to the manufacturer's instructions.

### Antibody expression and purification

Suspension HEK Expi293F™ cells (Gibco) were used for antibody production. Cell count and viability were assessed using a hemocytometer. Plasmids encoding the wild-type (WT) or modified heavy chain and WT light chain (25  $\mu$ g each) were added to 2.5 mL NaCl (150

mM) and 200  $\mu$ L polyethyleneimine (PEI) solution. DNA-PEI complexes were mixed by vortexing and incubated for at least 15 min at room temperature. For transient transfection, freshly cultured cells were adjusted to a cell titer of  $2.5 \times 10^6$  cells for a final volume of 30 mL. The DNA-PEI solution was added dropwise to the cells while gently shaking. The cells were supplemented with 825  $\mu$ L of 20% (w/v) tryptone 16-18 h post-transfection. Antibody expression was performed for 5 days at 37 °C, 110 rpm, and 8% CO<sub>2</sub>.

Production was stopped by centrifugation at  $1,000 \times g$  for 10 min and the supernatant was sterilized by filtration before purification. The cell culture supernatant was diluted with an equivalent volume of PBS and applied at a flow rate of 1 mL/min to a 1-mL Hi-Trap Protein A column (GE Healthcare) pre-equilibrated with at least 5 CV of PBS (pH 7.4). The column was subsequently washed with 5-10 column volumes of PBS buffer and the protein was recovered by isocratic elution (0.1 M sodium citrate pH 3) in 1-mL fractions were recovered into tubes containing 200  $\mu$ L of 1 M Tris-HCl (pH 9). Protein fractions were pooled according to the A<sub>280</sub> peak and dialyzed against 5 L of PBS buffer (pH 7.4) overnight at 4°C with stirring. Protein was concentrated to >2 mg/mL using an Amicon 50 kDa MWCO (Merck Millipore). Protein concentration was determined at A<sub>280</sub> using a molar extinction coefficient of  $2.1 \times 10^5 \text{ M}^{-1} \text{ cm}^{-1}$  and an approximate molecular weight of 150 kDa. Protein fractions were resolved by migration on 15% SDS-PAGE analysis to assess protein purity.

### **Production and purification of mTG**

Microbial transglutaminase was produced and purified as described previously<sup>1</sup>. The plasmid pET20b-FRAP-mTG was kindly provided by Professor M. Pietzsch (Martin-Luther-Universität, Halle-Wittenberg, Germany)<sup>2</sup>. The specific activity was determined by the hydroxamate test and purity was assessed by SDS-PAGE analysis<sup>3</sup>. Specific activity was between 5-30 U/mg and purity was over 80% (Fig. S4).

### **mTG conjugation assays**

For conjugation assays, trastuzumab glutamine variants (1 mg/mL) were incubated with 5 mM of the amino substrate: dansylcadaverine or N-[(1R,8S,9s)-bicyclo[6.1.0]non-4-yn-9-ylmethoxy carbonyl]-1,8-diamino-3,6-dioxaoctane (amino-BCN) (Sigma Aldrich), and mTG (6 U/mg of antibody) at 37 °C, with shaking at 600 rpm. After 24 h incubation, reactions were stopped by the addition of mTG blocker (Zedira) and analyzed by SDS-PAGE and hydrophobic interaction chromatography. Conjugation products were confirmed by LC-MS.

### **Click-chemistry reactions**

BCN-conjugated trastuzumab was purified over protein A spin column (GE Healthcare) according to the manufacturer's instructions. Azide-PEG<sub>3</sub>-vc-PAB-MMAE (MedChemExpress, 5 eq. per site) was added to the purified BCN-conjugated trastuzumab

(1 mg/mL) and incubated for 12 h at room temperature. Excess unconjugated MMAE was removed using an Amicon Ultra-0.5 (MWCO 10 kDa, Millipore Sigma), washing three times with PBS.

### **Visualization of reactivity by SDS-PAGE analysis**

SDS-PAGE analysis was performed for rapid visualization of reactivity with dansylcadaverine. An aliquot (5  $\mu$ g) of reactions and their corresponding negative control in reducing SDS gel loading dye were denatured at 98 °C for 10 min and resolved by migration on 10% SDS-PAGE. Gels were run at 200 V until elution of bromophenol blue. Before Coomassie staining, fluorescence was revealed using a GelDoc-It imaging system (UVP Imaging) with an emission filter at 590 nm.

### **Hydrophobic interaction chromatography (HIC)**

HIC was performed to assess the degree of conjugation (DoC) of the antibody variants with dansylcadaverine and BCN. A 2.5 mm  $\times$  4.6 mm  $\times$  35 mm TSKgel Butyl-NPR column (Tosoh Bioscience), fitted on an HPLC 1260 Infinity device (Agilent) equipped with a DAD detector was used for the analysis. Samples (35  $\mu$ g) were injected onto the column and separation was performed using a flow rate of 0.9 mL/min using a linear gradient of 0% to 100% eluent B over 35 min (eluent A: 1.5 M ammonium sulfate, Tris-HCl pH 7.5, eluent B: Tris-HCl pH 7.5) to determine reactivity of all variants with dansylcadaverine. BCN and MMAE conjugation to I253Q and WT trastuzumab were analyzed using a gradient of 0 to 100% over 20 min. Detection was performed at 220 nm and the area under the peak was used to determine the degree of conjugation.

### **HER2 receptor cell binding assay**

Flow cytometry was used to determine the binding affinity of glutamine-reactive variants of trastuzumab on HER2-overexpressing SK-BR-3 cells. Dilutions, incubation and washing steps were performed at 4 °C with PBS (pH 7.4) containing 1% BSA. Serial dilutions of the antibody (250 nM to 0.12 nM) were incubated for 1 h with  $2 \times 10^5$  cells. Phycoerythrin-labeled goat anti-human IgG Fc antibody (1:75 dilution) (Invitrogen) was added and incubated for 30 min. A BDInflux cell sorter and BD FACS software were used to determine cell fluorescence over  $5 \times 10^4$  events.

### **In vitro cytotoxicity**

SK-BR-3 and HeLa cells were used to determine the cytotoxicity and specificity of the I253Q trastuzumab glutamine variant conjugated to MMAE. In a 96-well plate, cells were seeded at 5 000 viable cells/well the day before the experiment. Serial dilutions (20 nM to 0.02 nM) of antibodies were incubated with either of the cell types for 72 h at 37 °C, 5% CO<sub>2</sub>. The CellTiter96® AQ<sub>ueous</sub> cell proliferation assay (Promega) was used to assess cell viability according to the manufacturer's instructions.

## **FcRn binding**

Affinity determination was performed on the Octet® RED96 system (FortéBio, Molecular Devices) using Octet® anti-human Fab-CH1 2<sup>nd</sup> generation (FAB2G) biosensors. Sensors were soaked in PBS pH 7.4 for 10 min, and subsequently loaded with 10 µg/ml of the antibody of interest in PBS pH 7.4 until a response of 0.7 to 1 nm was reached, followed by 2 min of quenching in kinetics buffer pH 6.0 (FortéBio). Association of decreasing concentrations of FcRn (kindly provided by Merck KGaA (Darmstadt, Germany)), ranging from 64 nM – 4 nM in a two-fold dilution series, was measured in PBS pH 6.0 for 7 min. As a negative control, kinetics buffer pH 6.0 was used instead of FcRn solution. Due to the pH-dependent binding mechanism of FcRn, dissociation was measured in PBS pH 7.4 for 10 min. All measurements were performed at 30 °C and 1,000 rpm. Binding kinetics were determined based on Savitzky-Golay filtering and a 1:1 Langmuir binding model using the respective negative control.

## **LC-MS**

Freshly prepared antibodies and mTG were used for MS analysis. LC-MS separations of intact proteins were performed on a TOF 6224A instrument coupled to an HPLC 1260 Infinity, both from Agilent Technologies. The chromatographic column was an Aeris widepore XB-C8, 3.6 µm, 4.6 x 100 mm column from Phenomenex. Eluents consisted of 0.1% formic acid in water (eluent A) and acetonitrile (eluent B). Elution was performed at 0.4 mL/min with a gradient from 10% B to 70% B over 9 min and a total run time of 15 min. The electrospray ionization source was used in positive ion mode and mass spectra were acquired from m/z 100 to 3200. Agilent Mass Hunter software was used for instrument control, data acquisition and analysis (Bioconfirm module).

**Supporting Table 1. Primers for mutagenesis on pTT5 trastuzumab heavy chain.**

| Position | Forward <sup>a</sup>                | Reverse                   |
|----------|-------------------------------------|---------------------------|
| M252Q    | CACCACCACGC <b>C</b> AGGTCACTTCGGGG | AGGATACCCTGCAGATCAGCCGGAC |
| I253Q    | ATACCCTGATGC <b>C</b> AGAGCCGGACCCC | ATCCACCACCACGCAGGTCACTTCG |
| S254Q    | CCCTGATGATCC <b>C</b> AGCGGACCCCCGA | CACATCCACCACCACGCAGGTCACT |
| V282Q    | ACGTGGACGGCC <b>C</b> AGGAAGTGCACAA | TTCCTCTCTGGGCTTGGTCTTGGCG |
| Y296Q    | GAGAGGAACAG <b>C</b> AGAACAGCACCTA  | CACTGTCAGCACGGACACCACCCGG |
| K340Q    | TCAGCAAGGCC <b>C</b> AGGGCCAGCCCCG  | AGGCAGTGTGTACACCTGGGGTTCG |
| P445Q    | TGAGCCTGAGCC <b>C</b> AGGGCTGAGGATC | TATTAGCCAGAGGTCGAGGTCGGGG |

<sup>a</sup> The mutagenic codon is indicated in bold.

**Supporting Table 2. Trastuzumab variant purification yields.**

| Variant | Yield (mg) |
|---------|------------|
| WT      | 1.7        |
| LLQG    | 1.5        |
| M252Q   | 0.9        |
| I253Q   | 1.5        |
| S254Q   | 1.2        |
| V282Q   | 1.0        |
| Y296Q   | 1.2        |
| K340Q   | 1.3        |
| P445Q   | 0.8        |

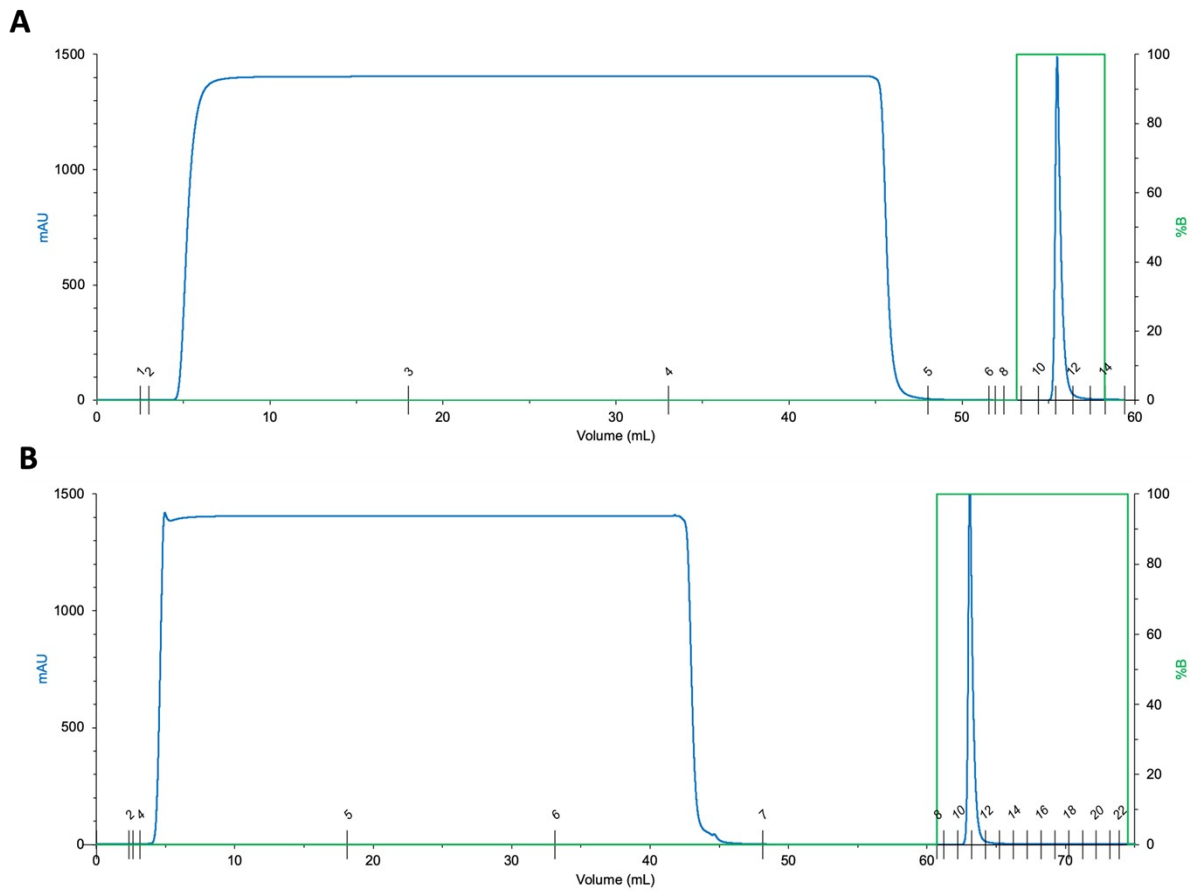

**Supporting Figure 1. Protein A purification chromatograms of A) WT and B) I253Q trastuzumab variants.** Blue curve represents absorbance at 280 nm and green curve shows percentage of B pump buffer. Fractions are indicated by ticks on x-axis.

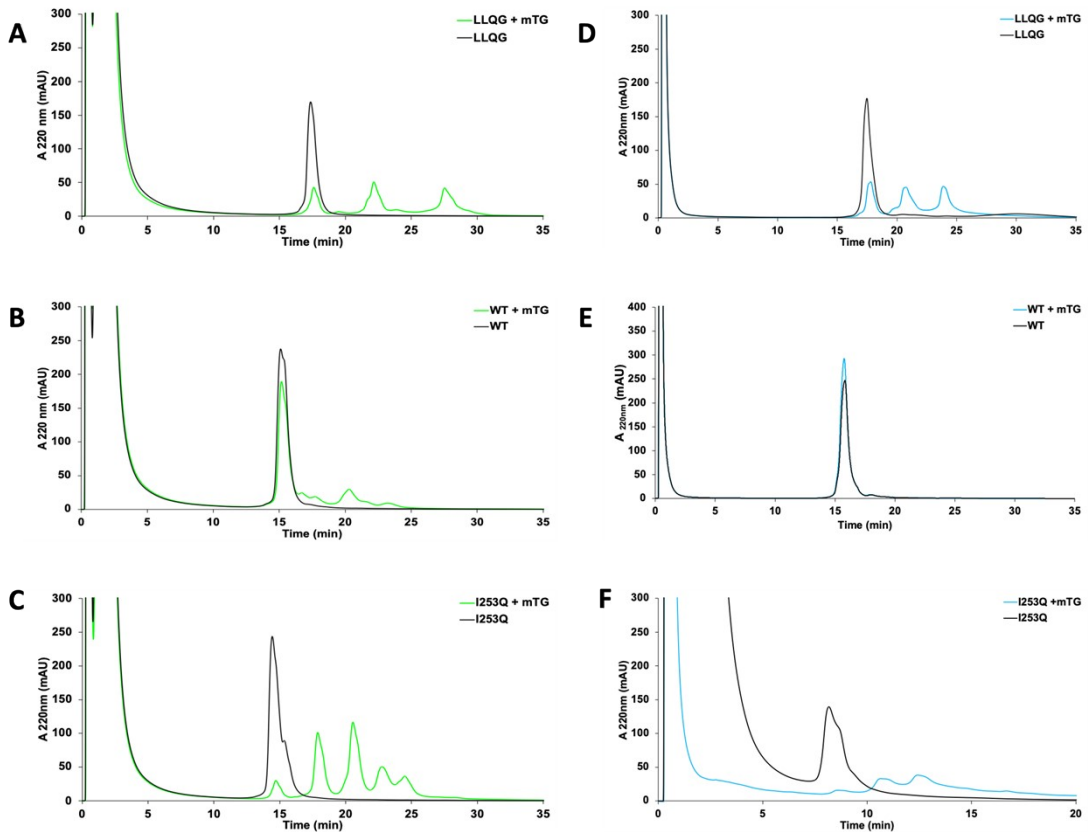

**Supporting Figure 2. HIC chromatograms for conjugation of trastuzumab with amino-substrates dansylcadaverine (A-C; green traces) or amino-BCN (D-F; blue traces). Conjugation of LLQG-tagged (A, D), WT (B, E) or I253Q trastuzumab (C-F) are shown.**

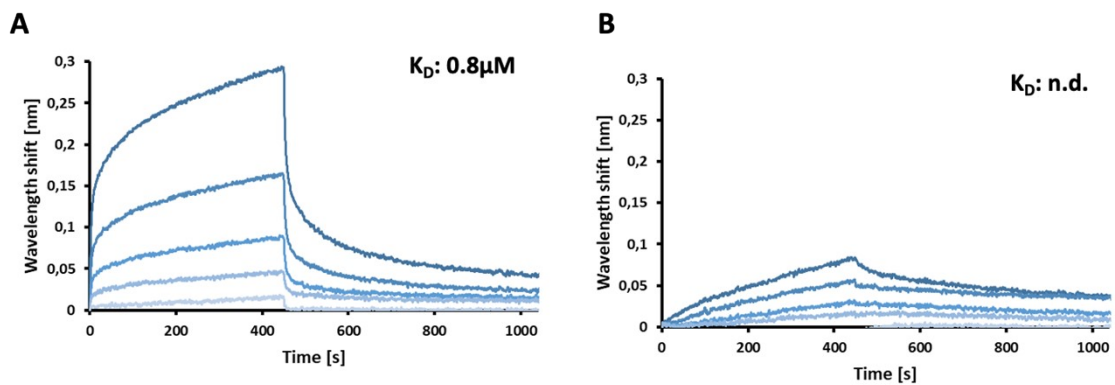

**Supporting Figure 3. FcRn binding evaluation by BLI. A. WT trastuzumab FcRn binding was evaluated at  $K_D = 0.8 \mu M$ . B. PBS was used to evaluate non-specific binding to FcRn.**

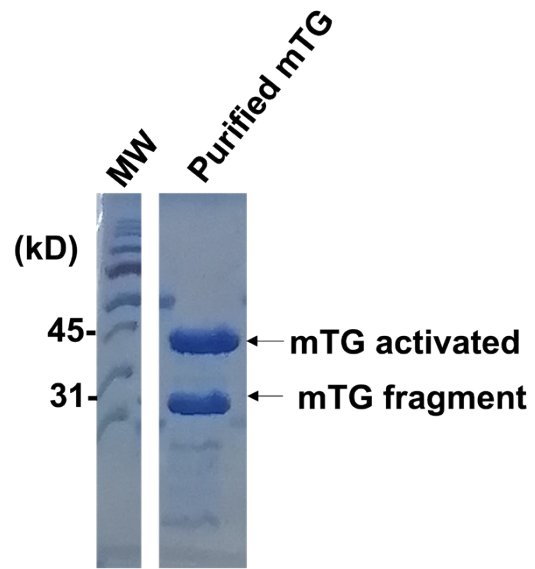

**Supporting Figure 4. Purity evaluation of purified mTG.** MW, molecular weight marker, Broad-range BioRad.



## Supporting references

- [1] Deweid, L., Hadjabdelhafid-Parisien, A., Lafontaine, K., Rochet, L. N. C., Kolmar, H., and Pelletier, J. N. (2020) Glutamine-walking: Creating reactive substrates for transglutaminase-mediated protein labeling, In *Methods Enzymol.*, Academic Press.
- [2] Marx, C. K., Hertel, T. C., and Pietzsch, M. (2007) Soluble expression of a pro-transglutaminase from *Streptomyces mobaraensis* in *Escherichia coli*, *Enzyme Microb Tech* 40, 1543-1550.
- [3] Folk, J. E., and Cole, P. W. (1966) Mechanism of action of guinea pig liver transglutaminase. I. Purification and properties of the enzyme: identification of a functional cysteine essential for activity, *J Biol Chem* 241, 5518-5525.
